# Supplementary material
Source: publisher site journal article supplement (https://www.dovepress.com/article/328522)

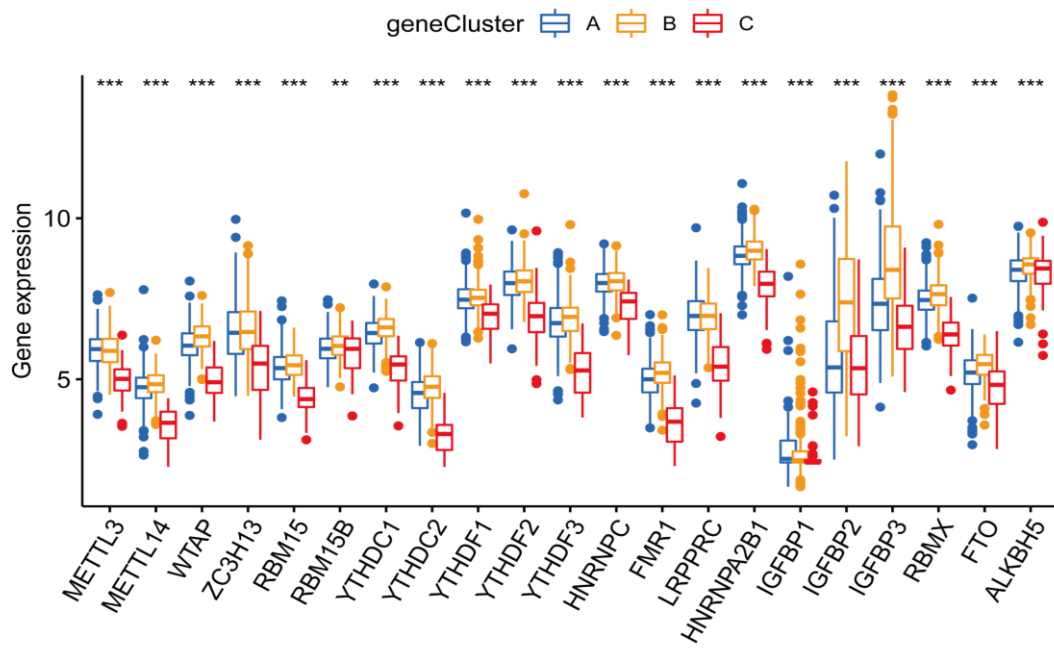

**Figure S1:** Differential expression of m6A genes in gene subclusters (\*\*\*) represents:  $P < 0.001$ ).

Supplement: Supplementary file 1 [file get_supplementary_file.php]
